# Supplementary material
Source: publisher figshare collection journal article supplement (https://sage.figshare.com/ndownloader/files/22773836)
Supplement: Supplementary file 1 [file 22773836]

**Supplementary Table 1 - Distribution of PARP-1 protein in adult monkey brain (pia mater, cerebral cortex, and white matter).**

| Organ | Histological location | Cell type               | Nuclear staining<br>(proportion of cells/staining intensity) |                       | Cytoplasmic staining |
|-------|-----------------------|-------------------------|--------------------------------------------------------------|-----------------------|----------------------|
|       |                       |                         | Main observation                                             | Secondary observation |                      |
| Brain | Meninge               |                         |                                                              |                       |                      |
|       | • Pia mater           | Epithelial cells        | Majority/strong                                              | Some/unlabeled        | -                    |
|       |                       | Connective tissue cells | Some/strong                                                  | Some/unlabeled        | -                    |
|       | Cerebral cortex       |                         |                                                              |                       |                      |
|       | • Molecular layer     | Neuroglial cells        | Majority/unlabeled                                           | Few/moderate          | -                    |
|       |                       | Neurons                 | Majority/weak                                                | Few/unlabeled         | Present              |
|       | • Pyramidal layer     | Neuroglial cells        | Some/unlabeled                                               | Few/weak              | -                    |
|       |                       | Neurons                 | Majority/weak                                                | Some/unlabeled        | Present              |
|       | • Granular layer      | Neuroglial cells        | Some/moderate                                                | Some/strong           | -                    |
|       |                       | Neurons                 | Majority/weak                                                | Few/moderate          | Present              |
|       | • Polymorphic layer   | Neuroglial cells        | Majority/strong                                              | Some/moderate         | -                    |
|       |                       | Neurons                 | Majority/unlabeled                                           | Few/weak              | Present              |
|       | • Transition layer    | Neuroglial cells        | Majority/strong                                              | Some/moderate         | -                    |
|       |                       | Neurons                 | Majority/unlabeled                                           | Few/weak              | Present              |
|       | White matter          | Neuroglial cells        | Majority/moderate                                            | Some/strong           | -                    |
|       |                       | Neurons                 | Majority/unlabeled                                           | Few/weak              | -                    |

**Supplementary Table 2 - Distribution of PARP-1 protein in adult monkey midbrain.**

| Organ    | Histological location | Cell type        | Nuclear staining<br>(proportion of cells/staining intensity) |                       | Cytoplasmic staining |
|----------|-----------------------|------------------|--------------------------------------------------------------|-----------------------|----------------------|
|          |                       |                  | Main observation                                             | Secondary observation |                      |
| Midbrain |                       | Neuroglial cells | Majority/strong                                              | Some/moderate         | -                    |
|          |                       | Neurons          | Majority/weak                                                | Few/moderate          | Present              |
|          |                       | Ependymal cells  | Some/strong                                                  | some/moderate         | Present              |

**Supplementary Table 3 - Distribution of PARP-1 protein in adult monkey cerebellum.**

| Organ      | Histological location | Cell type        | Nuclear staining<br>(proportion of cells/staining intensity) |                       | Cytoplasmic staining |
|------------|-----------------------|------------------|--------------------------------------------------------------|-----------------------|----------------------|
|            |                       |                  | Main observation                                             | Secondary observation |                      |
| Cerebellum | Molecular layer       | Neurons          | Majority/weak                                                | Few/moderate          | -                    |
|            | Purkinje layer        | Purkinje cells   | Some/strong                                                  | Some/moderate         | Present              |
|            | Granular layer        | Neurons          | Majority/unlabeled                                           | Few/strong            | -                    |
|            | White matter          | Neuroglial cells | Majority/strong                                              | Some/moderate         | -                    |

**Supplementary Table 4 - Distribution of PARP-1 protein in adult monkey pituitary.**

| Organ     | Histological location | Cell type                  | Nuclear staining<br>(proportion of cells/staining intensity) |                       | Cytoplasmic staining |
|-----------|-----------------------|----------------------------|--------------------------------------------------------------|-----------------------|----------------------|
|           |                       |                            | Main observation                                             | Secondary observation |                      |
| Pituitary | Pars distalis         | Glandular epithelial cells | Majority/strong                                              | Some/moderate         | Present              |
|           | Pars intermedia       | Follicular cells           | Majority/strong                                              | Few/moderate          | -                    |
|           | Pars nervosa          | Pituicytes                 | Majority/moderate                                            | Few/weak              | -                    |

**Supplementary Table 5 - Distribution of PARP-1 protein in adult monkey mammary gland.**

| Organ         | Histological location | Cell type                  | Nuclear staining<br>(proportion of cells/staining intensity) |                       | Cytoplasmic staining |
|---------------|-----------------------|----------------------------|--------------------------------------------------------------|-----------------------|----------------------|
|               |                       |                            | Main observation                                             | Secondary observation |                      |
| Mammary gland | Glandular tissue      | Epithelial glandular cells | Majority/strong                                              | Some/moderate         | Present              |
|               |                       | Ductal epithelial cells    | Majority/moderate                                            | Some/weak             | Present              |
|               |                       | Myoepithelial cells        | Majority /unlabeled                                          | Few/weak              | -                    |
|               | Connective tissue     | Fibrocytes                 | Majority/unlabeled                                           | Some/weak             | -                    |

**Supplementary Table 6 - Distribution of PARP-1 protein in adult monkey breast skin.**

| Organ       | Histological location  | Cell type                    | Nuclear staining<br>(proportion of cells/staining intensity) |                       | Cytoplasmic staining |
|-------------|------------------------|------------------------------|--------------------------------------------------------------|-----------------------|----------------------|
|             |                        |                              | Main observation                                             | Secondary observation |                      |
| Breast skin | Epidermis              | Epithelial cells             | Majority/moderate                                            | Some/unlabeled        | Present              |
|             | Dermis                 | Fibrocytes                   | Majority/unlabeled                                           | Few/weak              | -                    |
|             |                        | • Hair follicles             | Majority/unlabeled                                           | Few/weak              | -                    |
|             |                        | Cuticle cells                | All/unlabeled                                                | -                     | -                    |
|             |                        | Root sheath cells            | Majority/moderate                                            | Some/strong           | Present              |
|             |                        | Glassy membrane cells        | All/unlabeled                                                | -                     | -                    |
|             | • Arrector pili muscle | Muscle cells                 | All/strong                                                   | -                     | Present              |
|             |                        |                              |                                                              |                       | -                    |
|             |                        |                              |                                                              |                       |                      |
|             |                        |                              |                                                              |                       |                      |
|             | • Sebaceous gland      | Basal cells                  | Majority/strong                                              | Few/moderate          | Present              |
|             |                        | Immature secretory cells     | All/moderate                                                 | -                     | Present              |
|             |                        | Mature secretory cells       | Majority/weak                                                | Few/unlabeled         | Present              |
|             |                        | Degenerating secretory cells | All/unlabeled                                                | -                     | Present              |
|             | • Sweat gland          | Secretory cells              | Some/strong                                                  | Some/unlabeled        | Present              |
|             |                        | Myoepithelial cells          | All/unlabeled                                                | -                     | Unclear              |

Supplementary Table 7 - Distribution of PARP-1 protein in adult monkey skin.

| Organ | Histological location | Cell type                    | Nuclear staining<br>(proportion of cells/staining intensity) |                       | Cytoplasmic staining |
|-------|-----------------------|------------------------------|--------------------------------------------------------------|-----------------------|----------------------|
|       |                       |                              | Main observation                                             | Secondary observation |                      |
| Skin  | Epidermis             | Epithelial cells             | Majority/unlabeled                                           | Some/moderate         | Present              |
|       | Dermis                |                              |                                                              |                       |                      |
|       | • Hair follicles      | Hair cells                   | All/unlabeled                                                | -                     | -                    |
|       |                       | Cuticle cells                | All/unlabeled                                                | -                     | -                    |
|       |                       | Root sheath cells            | Majority/strong                                              | Few/weak              | -                    |
|       |                       | Glassy membrane cells        | All/unlabeled                                                | -                     | Unclear              |
|       | • Sebaceous gland     | Basal cells                  | Majority/strong                                              | Few/moderate          | -                    |
|       |                       | Immature secretory cells     | All/moderate                                                 | -                     | -                    |
|       |                       | Mature secretory cells       | All/weak                                                     | -                     | -                    |
|       |                       | Degenerating secretory cells | All/unlabeled                                                | -                     | -                    |
|       | • Sweat gland         | Secretory cells              | Some/strong                                                  | Some/unlabeled        | Present              |
|       |                       | Myoepithelial cells          | All/unlabeled                                                | -                     | Unclear              |

**Supplementary Table 8 - Distribution of PARP-1 protein in adult monkey ovary.**

| Organ | Histological location                    | Cell type                 | Nuclear staining<br>(proportion of cells/staining intensity) |                       | Cytoplasmic staining |
|-------|------------------------------------------|---------------------------|--------------------------------------------------------------|-----------------------|----------------------|
|       |                                          |                           | Main observation                                             | Secondary observation |                      |
| Ovary | Primordial follicles                     | Oocytes                   | All/strong                                                   | -                     | Present              |
|       |                                          | Squamous epithelial cells | Majority/moderate                                            | Few/unlabeled         | Unclear              |
|       | Primary follicles                        | Oocytes                   | Majority/strong                                              | Few/unlabeled         | Present              |
|       |                                          | Cuboidal granulosa cells  | Majority/strong                                              | Some/moderate         | Unclear              |
|       | Small second (growing) primary follicles | Oocytes                   | Majority /moderate                                           | Few/strong            | Present              |
|       |                                          | Granulosa cells           | Majority/strong                                              | Few/moderate          | Present              |
|       |                                          | Theca interna cells       | Majority/unlabeled                                           | Few/moderate          | -                    |
|       | Large second primary (growing) follicles | Oocytes                   | Majority/strong                                              | Some/moderate         | Present              |
|       |                                          | Granulosa cells           | Majority/strong                                              | Some/moderate         | Present              |
|       |                                          | Theca interna cells       | Majority/strong                                              | Few/unlabeled         | Present              |
|       | Secondary (vesicular) follicles          | Granulosa cells           | Majority/strong                                              | Some/moderate         | Present              |
|       |                                          | Theca interna             | Majority/strong                                              | Some/moderate         | Present              |
|       |                                          | Theca externa             | Majority/strong                                              | Some/moderate         | Present              |
|       | Atretic follicles                        | Granulosa cells           | Majority/strong                                              | Some/unlabeled        | Present              |
|       | Stroma                                   | Fibrocytes                | Majority/unlabeled                                           | Some/moderate         | -                    |
|       | Corpus luteum                            | Granulosa lutein cells    | Some/moderate                                                | Some/unlabeled        | -                    |
|       | Capillaries                              | Endothelial cells         | Majority/unlabeled                                           | Few/weak              | Present              |

Supplementary Table 9 - Distribution of PARP-1 protein in adult monkey testis.

| Organ  | Histological location | Cell type            | Nuclear staining<br>(proportion of cells/staining intensity) |                       | Cytoplasmic staining |
|--------|-----------------------|----------------------|--------------------------------------------------------------|-----------------------|----------------------|
|        |                       |                      | Main observation                                             | Secondary observation |                      |
| Testis | Seminiferous tubule   | Elongated spermatids | All/unlabeled                                                | -                     | -                    |
|        |                       | Round spermatids     | Majority/strong                                              | Few/unlabeled         | -                    |
|        |                       | Spermatocytes        | Some/unlabeled                                               | Some/moderate         | -                    |
|        |                       | Spermatogonia        | Some/moderate                                                | Some/unlabeled        | -                    |
|        |                       | Sertoli cells        | All/unlabeled                                                | -                     | -                    |
|        | Connective tissue     | Leydig cells         | Majority/unlabeled                                           | Few/moderate          | -                    |

Supplementary Table 10 - Distribution of PARP-1 protein in adult monkey efferent ductules.

| Organ             | Histological location | Cell type                         | Nuclear staining<br>(proportion of cells/staining intensity) |                       | Cytoplasmic staining |
|-------------------|-----------------------|-----------------------------------|--------------------------------------------------------------|-----------------------|----------------------|
|                   |                       |                                   | Main observation                                             | Secondary observation |                      |
| Efferent Ductules |                       | Pseudostratified epithelial cells | Some/moderate                                                | Some/unlabeled        | Present              |

Supplementary Table 11 - Distribution of PARP-1 protein in adult monkey epididymis.

| Organ      | Histological location | Cell type           | Nuclear staining<br>(proportion of cells/staining intensity) |                       | Cytoplasmic staining |
|------------|-----------------------|---------------------|--------------------------------------------------------------|-----------------------|----------------------|
|            |                       |                     | Main observation                                             | Secondary observation |                      |
| Epididymis | Head                  |                     |                                                              |                       |                      |
|            | • Pseudostratified    | Principal cells     | Majority/strong                                              | Some/unlabeled        | Present              |
|            | Columnar              | Basal cells         | Majority/weak                                                | Some/unlabeled        | Present              |
|            | Epithelium            |                     |                                                              |                       |                      |
|            | Body                  |                     |                                                              |                       |                      |
|            | • Pseudostratified    | Principal cells     | Majority/strong                                              | Some/moderate         | Present              |
|            | Columnar              | Basal cells         | Majority/weak                                                | Few/strong            | Present              |
|            | Epithelium            |                     |                                                              |                       |                      |
|            | Tail                  |                     |                                                              |                       |                      |
|            | • Pseudostratified    | Principal cells     | Some/strong                                                  | Some/weak             | Present              |
|            | Columnar              | Basal cells         | All/weak                                                     | -                     | Present              |
|            | Epithelium            |                     |                                                              |                       |                      |
|            | Muscular layer        | Smooth muscle cells | Majority/unlabeled                                           | Some/strong           | Present              |
|            | Blood vessels         |                     |                                                              |                       |                      |
|            | Tunica intima         | Epithelial cells    | Majority/unlabeled                                           | Few/weak              | Present              |
|            | Tunica media          | Smooth muscle cells | Majority/unlabeled                                           | Few/weak              | Present              |

**Supplementary Table 12 - Distribution of PARP-1 protein in adult monkey seminal vesicle.**

| Organ           | Histological location | Cell type                  | Nuclear staining<br>(proportion of cells/staining intensity) |                       | Cytoplasmic staining |
|-----------------|-----------------------|----------------------------|--------------------------------------------------------------|-----------------------|----------------------|
|                 |                       |                            | Main observation                                             | Secondary observation |                      |
| Seminal vesicle | Terminal ganglia      | Neurons                    | Majority/strong                                              | Few/moderate          | Present              |
|                 |                       | Satellite cells            | Some/strong                                                  | Some/unlabeled        | -                    |
|                 | Glandular epithelium  | Glandular epithelial cells | Some/strong                                                  | Some/unlabeled        | Present              |
|                 |                       | Stromal cells              | Majority/unlabeled                                           | Few/strong            | -                    |
|                 | Smooth muscle         | Smooth muscle cells        | Majority/strong                                              | Some/unlabeled        | Present              |

**Supplementary Table 13 - Distribution of PARP-1 protein in adult monkey prostate.**

| Organ    | Histological location | Cell type        | Nuclear staining<br>(proportion of cells/staining intensity) |                       | Cytoplasmic staining |
|----------|-----------------------|------------------|--------------------------------------------------------------|-----------------------|----------------------|
|          |                       |                  | Main observation                                             | Secondary observation |                      |
| Prostate | Cranial lobe          | Epithelial cells | Some/weak                                                    | Some/unlabeled        | -                    |
|          |                       | Stromal cells    | Some/unlabeled                                               | Some/strong           | Present              |
|          | Caudal lobe           | Epithelial cells | Majority/unlabeled                                           | Few/weak              | -                    |
|          |                       | Stromal cells    | Some/strong                                                  | Some/unlabeled        | Present              |



Supplementary Table 14 - Distribution of PARP-1 protein in adult monkey adrenal.

| Organ   | Histological location | Cell type              | Nuclear staining<br>(proportion of cells/staining intensity) |                       | Cytoplasmic staining |
|---------|-----------------------|------------------------|--------------------------------------------------------------|-----------------------|----------------------|
|         |                       |                        | Main observation                                             | Secondary observation |                      |
| Adrenal | Cortex (male)         | Zona glomerulosa cells | Majority/strong                                              | Few/moderate          | Present              |
|         |                       | Zona fasciculata cells | Majority/strong                                              | Some/moderate         | Present              |
|         |                       | Zona reticularis cells | Some/strong                                                  | Some/unlabeled        | Present              |
|         | Medulla (male)        | Chromaffin Cells       | Majority/strong                                              | Few/unlabeled         | Present              |
|         | Cortex (female)       | Zona glomerulosa cells | Majority/strong                                              | Some/moderate         | -                    |
|         |                       | Zona fasciculata cells | Some/strong                                                  | Some/weak             | Present              |
|         |                       | Zona reticularis cells | Majority/unlabeled                                           | Some/weak             | -                    |
|         | Medulla (female)      | Chromaffin cells       | Some/strong                                                  | Some/weak             | Present              |

Supplementary Table 15 - Distribution of PARP-1 protein in adult monkey pancreas.

| Organ    | Histological location | Cell type             | Nuclear staining<br>(proportion of cells/staining intensity) |                       | Cytoplasmic staining |
|----------|-----------------------|-----------------------|--------------------------------------------------------------|-----------------------|----------------------|
|          |                       |                       | Main observation                                             | Secondary observation |                      |
| Pancreas | Serous acini          | Secretory cells       | Majority/strong                                              | Some/unlabeled        | -                    |
|          | Langerhans’s islet    | Langerhans cells      | Majority/strong                                              | Some/moderate         | Present              |
|          | Intralobular ducts    | Cuboidal ductal cells | Majority/moderate                                            | Few/unlabeled         | Present              |
|          | interlobular ducts    | Cuboidal ductal cells | Majority/moderate                                            | Some/unlabeled        | Present              |
|          | Ganglion              | Neurons               | All/moderate                                                 | -                     | Present              |
|          |                       | Satellite cells       | Majority/strong                                              | Few/unlabeled         | -                    |

Supplementary Table 16 - Distribution of PARP-1 protein in adult monkey stomach.

| Organ   | Histological location | Cell type            | Nuclear staining<br>(proportion of cells/staining intensity) |                       | Cytoplasmic staining |
|---------|-----------------------|----------------------|--------------------------------------------------------------|-----------------------|----------------------|
|         |                       |                      | Main observation                                             | Secondary observation |                      |
| Stomach | Gastric pits          | Surface mucous cells | Majority/unlabeled                                           | Some/weak             | Present              |
|         |                       | Parietal cells       | Majority/strong                                              | Few/moderate          | -                    |
|         | Fundic glands         | Mucous neck cells    | Some/moderate                                                | Some/unlabeled        | Present              |
|         |                       | Parietal cells       | Some/moderate                                                | Some/strong           | -                    |
|         |                       | Chief cells          | Majority/unlabeled                                           | Few/strong            | -                    |
|         | Muscularis mucosa     | Smooth muscle cells  | Some/weak                                                    | Some/unlabeled        | Present              |
|         | Lamina propria        | Fibrocytes           | Majority/unlabeled                                           | Few/weak              | Present              |
|         | Blood vessels         | Epithelial cells     | Majority/unlabeled                                           | Few/weak              | Present              |

Supplementary Table 17 - Distribution of PARP-1 protein in adult monkey heart.

| Organ | Histological location | Cell type             | Nuclear staining<br>(proportion of cells/staining intensity) |                       | Cytoplasmic staining |
|-------|-----------------------|-----------------------|--------------------------------------------------------------|-----------------------|----------------------|
|       |                       |                       | Main observation                                             | Secondary observation |                      |
| Heart | Ventricle             | Striated muscle cells | Majority/moderate                                            | Some/unlabeled        | Present              |
|       | Atrium                | Striated muscle cells | Some/strong                                                  | Some/unlabeled        | Present              |

Supplementary Table 18 - Distribution of PARP-1 protein in adult monkey lungs.

| Organ | Histological location | Cell type                 | Nuclear staining<br>(proportion of cells/staining intensity) |                       | Cytoplasmic staining |
|-------|-----------------------|---------------------------|--------------------------------------------------------------|-----------------------|----------------------|
|       |                       |                           | Main observation                                             | Secondary observation |                      |
| Lung  | Alveoli               | Type I pneumocytes        | Some/strong                                                  | Some/unlabeled        | Present              |
|       |                       | Type II pneumocytes       | -                                                            | -                     | -                    |
|       |                       | Macrophages               | All/unlabeled                                                | -                     | Present              |
|       | Capillaries           | Endothelial cells         | Majority/unlabeled                                           | Few/weak              | Present              |
|       | Bronchiole            | Cuboidal epithelial cells | Majority/weak                                                | Few/moderate          | Present              |
|       |                       | Smooth muscle cell        | Majority/unlabeled                                           | Few/weak              | Present              |
|       | Bronchi               | Ciliated columnar cells   | Majority/moderate                                            | Few/unlabeled         | -                    |
|       |                       | Goblet cells              | All/unlabeled                                                | -                     | -                    |
|       |                       | Smooth muscle cells       | Majority/unlabeled                                           | Few/weak              | Present              |
|       |                       | Fibrocytes                | Majority/unlabeled                                           | Few/weak              | -                    |
|       |                       | Chondrocytes              | Some/strong                                                  | Some/unlabeled        | -                    |

Supplementary Table 19 - Distribution of PARP-1 protein in adult monkey salivary glands.

| Organ           | Histological location | Cell type                      | Nuclear staining<br>(proportion of cells/staining intensity) |                       | Cytoplasmic staining |
|-----------------|-----------------------|--------------------------------|--------------------------------------------------------------|-----------------------|----------------------|
|                 |                       |                                | Main observation                                             | Secondary observation |                      |
| Salivary glands | Serous acini          | Serous cells                   | Majority/unlabeled                                           | Few/weak              | -                    |
|                 | Intralobular ducts    | Striated duct columnar cells   | Majority/moderate                                            | Some/unlabeled        | Present              |
|                 |                       | Intercalated duct cells        | All/weak                                                     | -                     | Present              |
|                 | Excretory duct        | Tall columnar epithelial cells | Majority/moderate                                            | Some/unlabeled        | Present              |
|                 |                       | Goblet cells                   | Majority/unlabeled                                           | Few/weak              | -                    |
|                 | Blood vessels         | Endothelial cells              | Majority/unlabeled                                           | Few/weak              | Present              |

Supplementary Table 20 - Distribution of PARP-1 protein in adult monkey spleen.

| Organ  | Histological location           | Cell type         | Nuclear staining<br>(proportion of cells/staining intensity) |                       | Cytoplasmic staining |
|--------|---------------------------------|-------------------|--------------------------------------------------------------|-----------------------|----------------------|
|        |                                 |                   | Main observation                                             | Secondary observation |                      |
| Spleen | White pulp                      |                   |                                                              |                       |                      |
|        | • Germinal center               | B Lymphocytes     | Majority/strong                                              | Some/unlabeled        | -                    |
|        | • Mantle Zone                   | B Lymphocytes     | Majority/weak                                                | Few/moderate          | -                    |
|        | • Marginal Zone                 | B Lymphocytes     | Majority/weak                                                | Some/unlabeled        | -                    |
|        | • Central arterioles            | Endothelial cells | All/unlabeled                                                | -                     | -                    |
|        | • Periarterial lymphatic sheath | T Lymphocytes     | Majority/moderate                                            | Some/weak             | -                    |
|        | Red pulp                        | Lymphocytes       | Majority/unlabeled                                           | Some/strong           | -                    |
|        | • Splenic sinusoid              | Endothelial cells | Majority/unlabeled                                           | Few/weak              | -                    |

Supplementary Table 21 - Distribution of PARP-1 protein in adult monkey thymus.

| Organ  | Histological location  | Cell type                  | Nuclear staining<br>(proportion of cells/staining intensity) |                       | Cytoplasmic staining |
|--------|------------------------|----------------------------|--------------------------------------------------------------|-----------------------|----------------------|
|        |                        |                            | Main observation                                             | Secondary observation |                      |
| Thymus | Cortex                 | Lymphocytes                | Majority/unlabeled                                           | Few/strong            | -                    |
|        | Medulla                | Lymphocytes                | Majority/strong                                              | Some/weak             | -                    |
|        |                        | Epithelial reticular cells | Majority/unlabeled                                           | Few/moderate          | -                    |
|        | • Hassall’s corpuscles | Epithelial cells           | All/unlabeled                                                | -                     | -                    |

**Supplementary Table 22 - Distribution of PARP-1 protein in adult monkey urinary bladder.**

| Organ           | Histological location   | Cell type           | Nuclear staining<br>(proportion of cells/staining intensity) |                       | Cytoplasmic staining |
|-----------------|-------------------------|---------------------|--------------------------------------------------------------|-----------------------|----------------------|
|                 |                         |                     | Main observation                                             | Secondary observation |                      |
| Urinary Bladder | Transitional epithelium | Epithelial cells    | Majority/weak                                                | Few/unlabeled         | Present              |
|                 | Lamina propria          | Fibrocytes          | Some/moderate                                                | Some/unlabeled        | -                    |
|                 | Muscularis externa      | Smooth muscle cells | Majority/strong                                              | Few/unlabeled         | Present              |

**Supplementary Table 23 - Distribution of PARP-1 protein in adult monkey uterus.**

| Organ  | Histological location  | Cell type                  | Nuclear staining<br>(proportion of cells/staining intensity) |                       | Cytoplasmic staining |
|--------|------------------------|----------------------------|--------------------------------------------------------------|-----------------------|----------------------|
|        |                        |                            | Main observation                                             | Secondary observation |                      |
| Uterus | Ectocervix             |                            |                                                              |                       |                      |
|        | • Squamous epithelium  | Epithelial cells           | Majority/strong                                              | Some/unlabeled        | Present              |
|        | • Glandular epithelium | Glandular epithelial cells | Majority/unlabeled                                           | Some/strong           | -                    |
|        | • Lamina propria       | Fibrocytes                 | Some/unlabeled                                               | Some/strong           | Present              |
|        | Endocervix             |                            |                                                              |                       |                      |
|        | • Columnar epithelium  | Epithelial cells           | Majority/unlabeled                                           | Some/strong           | -                    |
|        | • Glandular epithelium | Glandular epithelial cells | Some/unlabeled                                               | Some/strong           | Present              |
|        | • Lamina propria       | Fibrocytes                 | Some/unlabeled                                               | Some/strong           | -                    |
|        | Transformation zone    |                            |                                                              |                       |                      |
|        | • Squamous epithelium  | Epithelial cells           | Majority/moderate                                            | Few/strong            | Present              |
|        | • Glandular epithelium | Glandular epithelial cells | Majority/unlabeled                                           | Few/moderate          | -                    |
|        | Endometrium            |                            |                                                              |                       |                      |
|        | • Columnar epithelium  | Epithelial cells           | Some/moderate                                                | Some/unlabeled        | Present              |
|        | • Stroma               | Stromal cells              | Majority/strong                                              | Some/unlabeled        | -                    |

|  |                        |                            |                    |                |         |
|--|------------------------|----------------------------|--------------------|----------------|---------|
|  | • Glandular epithelium | Glandular epithelial cells | Majority/strong    | Some/unlabeled | Present |
|  | Terminal ganglion      | Neurons                    | Majority/weak      | Some/unlabeled | Present |
|  |                        | Satellite cells            | Majority/unlabeled | Some/strong    | -       |
|  | Myometrium             | Smooth muscle cells        | Majority/moderate  | Some/unlabeled | Present |
|  | Blood vessels          |                            |                    |                |         |
|  | • Tunica intima        | Endothelial cells          | Majority/unlabeled | Few/weak       | -       |
|  | • Tunica media         | Smooth muscle cells        | Majority/unlabeled | Few/weak       | Present |
|  | • Tunica adventitia    | Fibrocytes                 | All/unlabeled      | -              | -       |

**Supplementary Table 24 - Distribution of PARP-1 protein in adult monkey thyroid.**

| Organ   | Histological location | Cell type            | Nuclear staining<br>(proportion of cells/staining intensity) |                       | Cytoplasmic staining |
|---------|-----------------------|----------------------|--------------------------------------------------------------|-----------------------|----------------------|
|         |                       |                      | Main observation                                             | Secondary observation |                      |
| Thyroid | Follicles             | Follicular cells     | Majority/unlabeled                                           | Few/moderate          | Present              |
|         | Parafollicles         | Parafollicular cells | All/unlabeled                                                | -                     | Present              |
|         | Blood vessels         | Endothelial cells    | Some/weak                                                    | Some/unlabeled        | Present              |
